# Supplementary material for: Computational screening of defective BC3-supported single-atom catalysts for electrochemical CO2 reduction
Source: Royal Society of Chemistry journal article supplement (doi:10.1039/d4cp01217h), 2024-01-01
Supplement: d4cp01217h1.pdf [file d4cp01217h1.pdf]

## Supporting Information

### Computational Screening of Defective BC<sub>3</sub>-Supported Single-Atom Catalysts for Electrochemical CO<sub>2</sub> Reduction

Renyi Li<sup>1</sup>, Caimu Wang<sup>1</sup>, Yaozhong Liu<sup>1</sup>, Chengxiang Suo<sup>1</sup>, Danyang Zhang<sup>1</sup>,  
Jiao Zhang<sup>1</sup>, Wei Guo<sup>\*,1,2</sup>

<sup>1</sup> Centre for Quantum Physics, Key Laboratory of Advanced Optoelectronic Quantum Architecture  
and Measurement (MOE), School of Physics, Beijing Institute of Technology,  
Beijing 100081, China

<sup>2</sup> Frontiers Science Center for High Energy Material (MOE), Beijing Institute of Technology,  
Beijing 100081, China

#### Note:

The  $\Delta G(*\text{OCHO})$  and  $\Delta G(*\text{COOH})$  are the free energy changes of the two intermediates after the first hydrogenation step of eCO<sub>2</sub>RR (\* denotes the catalyst):

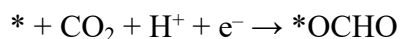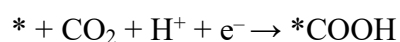

which can be obtained by the definition:

$$\Delta G(*\text{OCHO}) = G(*\text{OCHO}) - G(*) - G(\text{CO}_2) - G(\text{H}^+ + \text{e}^-)$$

$$\Delta G(*\text{COOH}) = G(*\text{COOH}) - G(*) - G(\text{CO}_2) - G(\text{H}^+ + \text{e}^-)$$

where  $G(*\text{OCHO})$ ,  $G(*\text{COOH})$  and  $G(*)$  are the free energies of  $*\text{OCHO}$ ,  $*\text{COOH}$  and catalyst.  $G(\text{CO}_2)$  is the free energy of a CO<sub>2</sub> in gas phase.  $G(\text{H}^+ + \text{e}^-)$  is the free energy of the proton-electron pair, which can be calculated by setting the reference potential to the potential of the standard hydrogen electrode<sup>1</sup>:

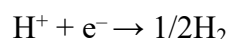

$\Delta G$  of this reaction is expressed as below:

$$\Delta G = 1/2G(\text{H}_2) - G(\text{H}^+ + \text{e}^-),$$

when this reaction is in equilibrium and  $\Delta G$  is equal to 0, i.e.,  $G(\text{H}^+ + \text{e}^-)$  is equal to half the free energy of H<sub>2</sub>. Similarly,  $\Delta G(*\text{H})$  can be calculated by the formula:

$$\Delta G(*\text{H}) = G(*\text{H}) - G(*) - 1/2G(\text{H}_2),$$

where  $G(*H)$  is the free energy of H adsorbed on catalyst. The comparison of  $\Delta G(*OCHO$  or  $*COOH)$  and  $\Delta G(*H)$  enables the estimation of the selectivity between eCO<sub>2</sub>RR and HER<sup>2</sup>.

**Table S1** Structural parameters and band gap of BC<sub>3</sub> monolayer.

|                           | Lattice constant (Å) | $l_{C-C}$ (Å) | $l_{C-B}$ (Å) | Band gap (eV) |
|---------------------------|----------------------|---------------|---------------|---------------|
| This work (PBE)           | 5.17                 | 1.42          | 1.56          | 0.63          |
| Theor. (PBE) <sup>3</sup> | 5.17                 | 1.42          | 1.56          | 0.65          |
| Theor. (PBE) <sup>4</sup> | 5.17                 | 1.42          | 1.56          | 0.61          |
| Exp. <sup>5</sup>         | 5.20±0.2             | 1.42          | 1.55          | /             |

**Table S2** The values of U – J parameters for PBE+U calculations<sup>6,7</sup>.

| TM    | Sc   | Ti   | V    | Cr   | Mn   | Fe   | Co   | Ni   | Cu   | Zn   |
|-------|------|------|------|------|------|------|------|------|------|------|
| U – J | 2.11 | 2.58 | 2.72 | 2.79 | 3.06 | 3.29 | 3.42 | 3.40 | 3.87 | 4.12 |

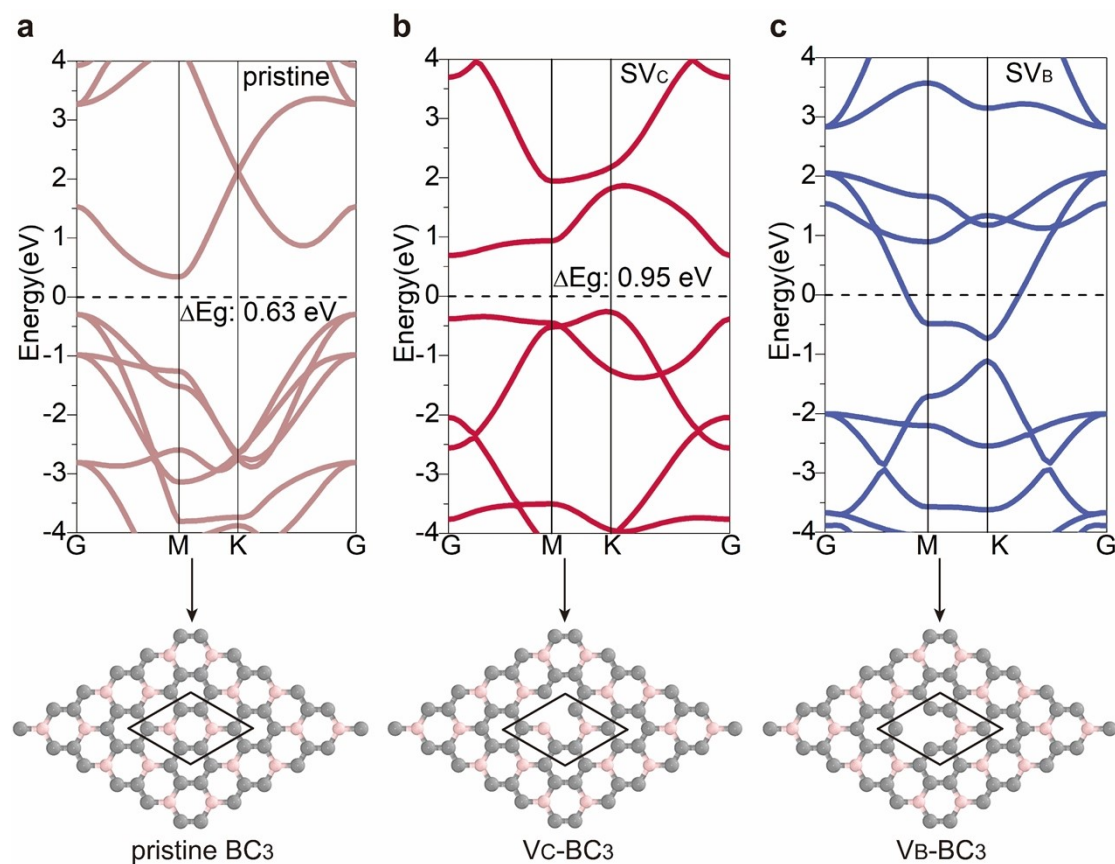

**Figure S1.** Band structures of (a) pristine BC<sub>3</sub>, (b) V<sub>C</sub>-BC<sub>3</sub> and (c) V<sub>B</sub>-BC<sub>3</sub>. The atomic structures

are shown below. The solid lines represent the lattice of the unit cell. The band structures are calculated using the unit cells of pristine  $BC_3$  and defective  $BC_3$ .

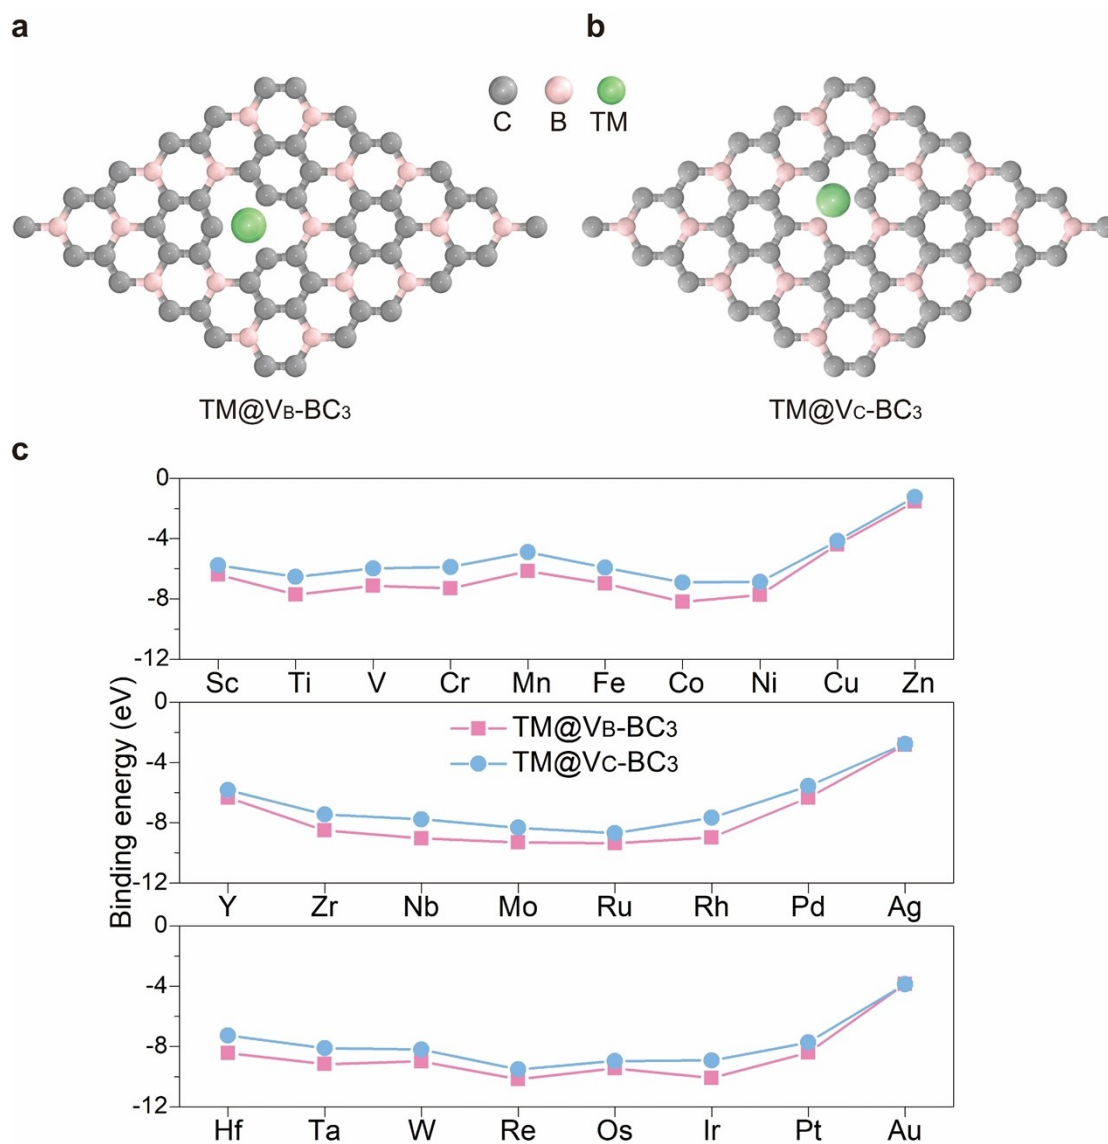

**Figure S2.** Structural models of (a)  $TM@V_B-BC_3$  and (b)  $TM@V_C-BC_3$ . (c) Binding energy of TM SAs anchored on  $V_B-BC_3$  and  $V_C-BC_3$ .

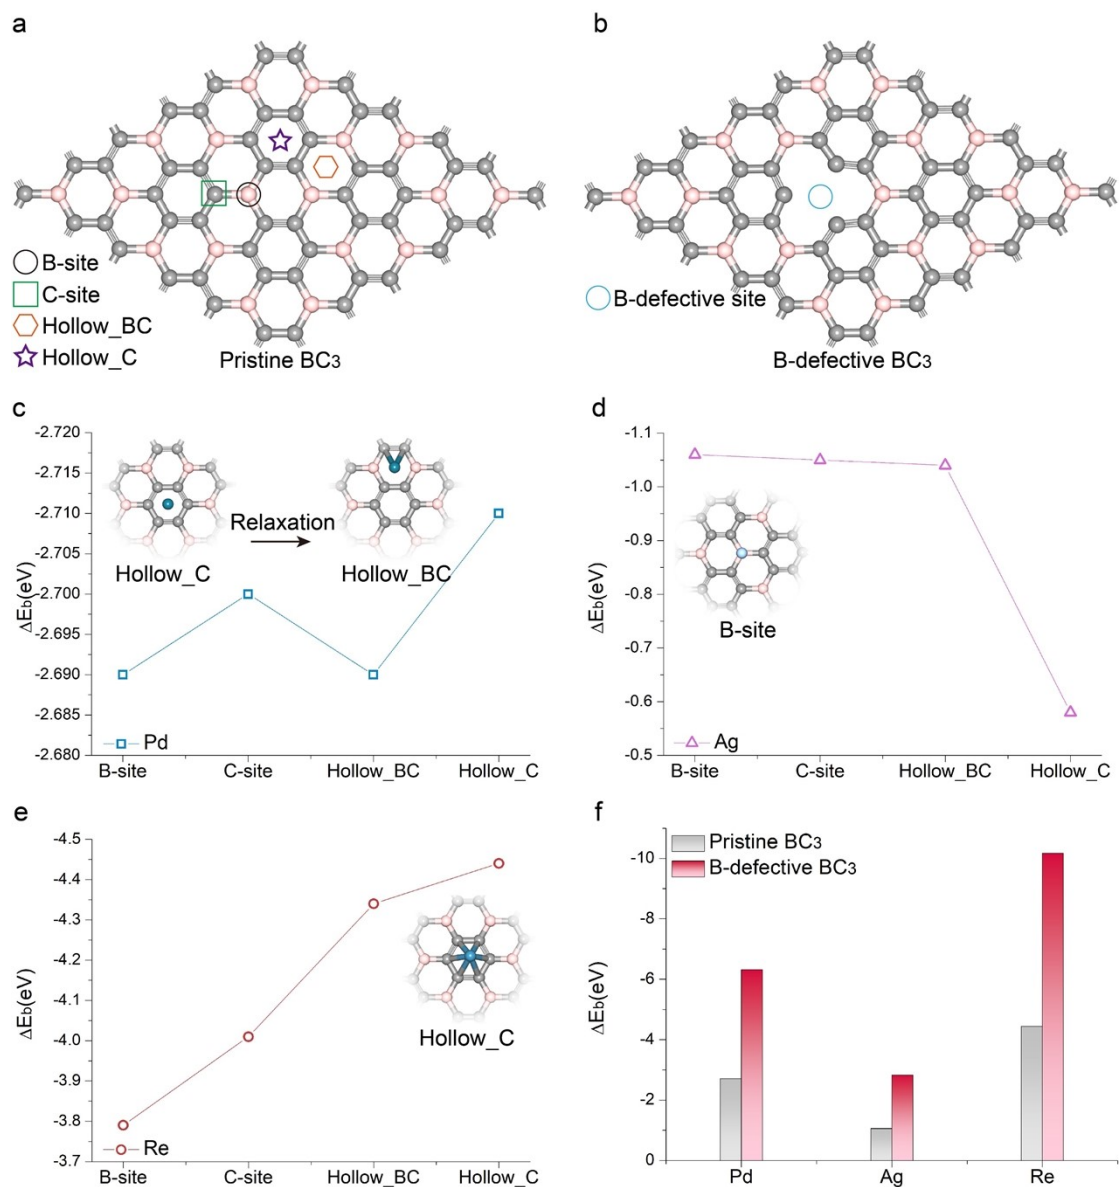

**Figure S3.** Anchoring sites of TM SAs on (a) pristine BC<sub>3</sub> and (b) B-defective BC<sub>3</sub>. Binding energy ( $\Delta E_b$ ) of (c) Pd, (d) Ag and (e) Re on pristine BC<sub>3</sub>. (f)  $\Delta E_b$  of TM SAs on pristine BC<sub>3</sub> and B-defective BC<sub>3</sub>.

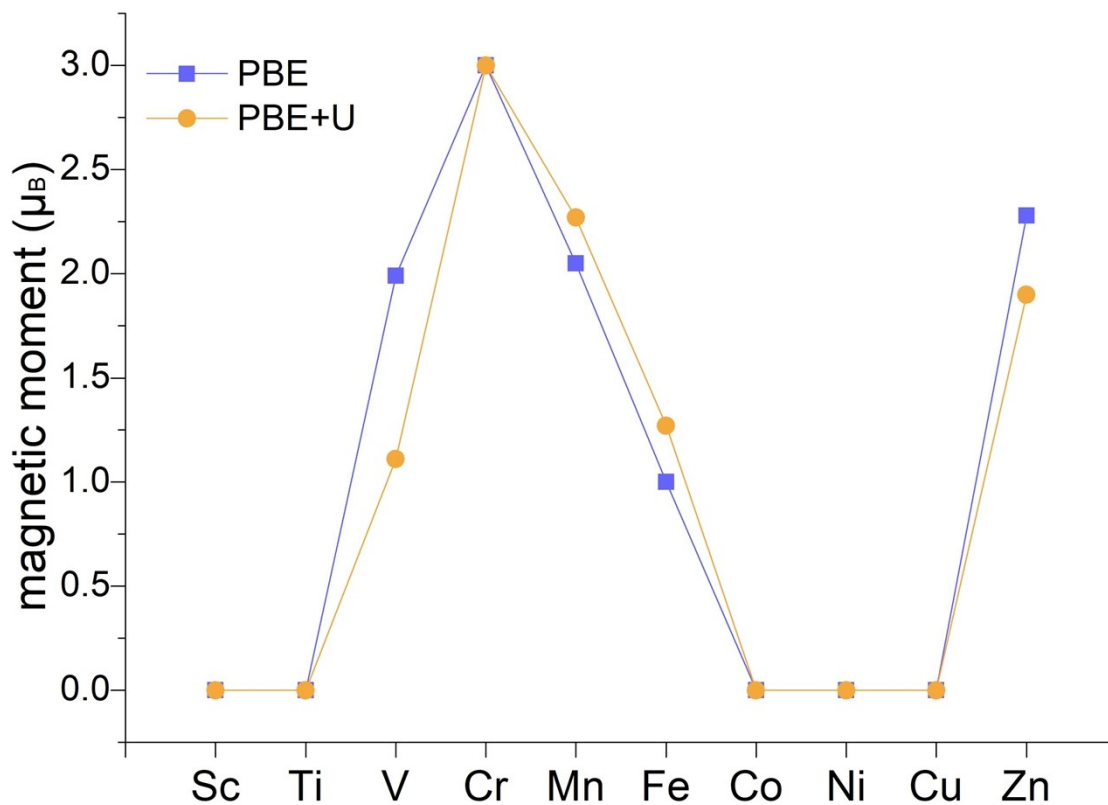

Figure S4. Magnetic moment ( $\mu_B$ ) of 3d TM SAs in TM@ BC<sub>3</sub> at PBE level and PBE+U level.

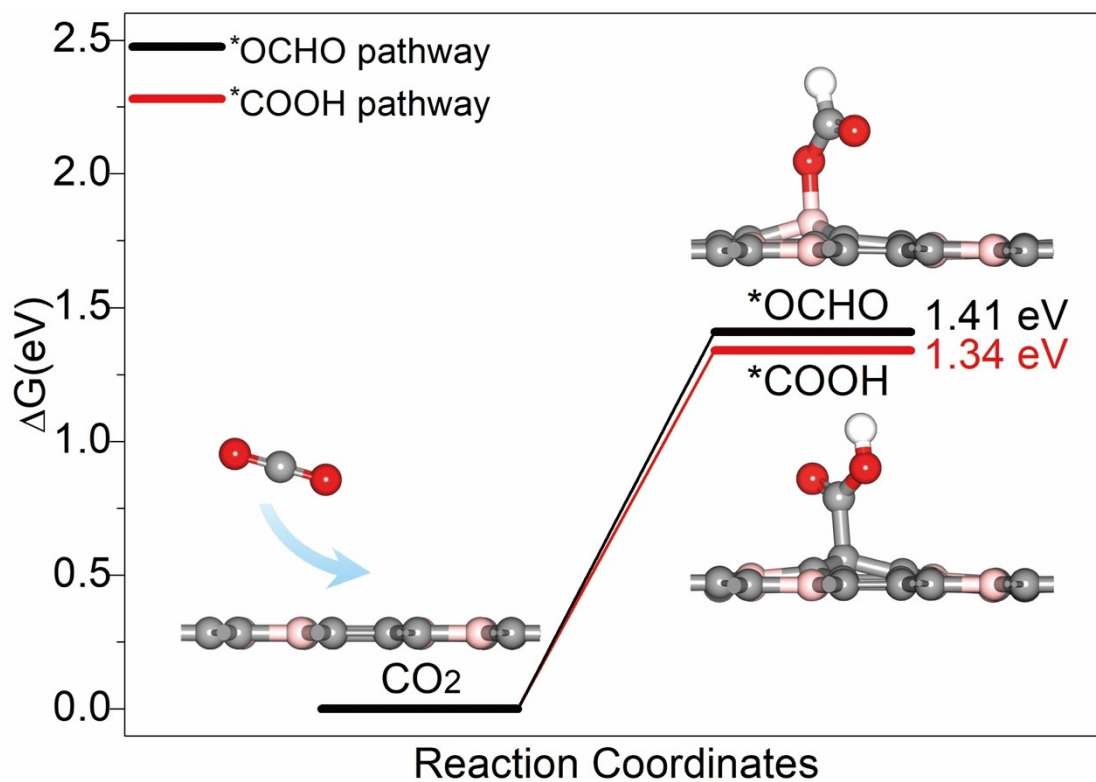

Figure S5. Free energy diagram of eCO<sub>2</sub>RR to \*OCHO and \*COOH intermediates on pristine BC<sub>3</sub>.

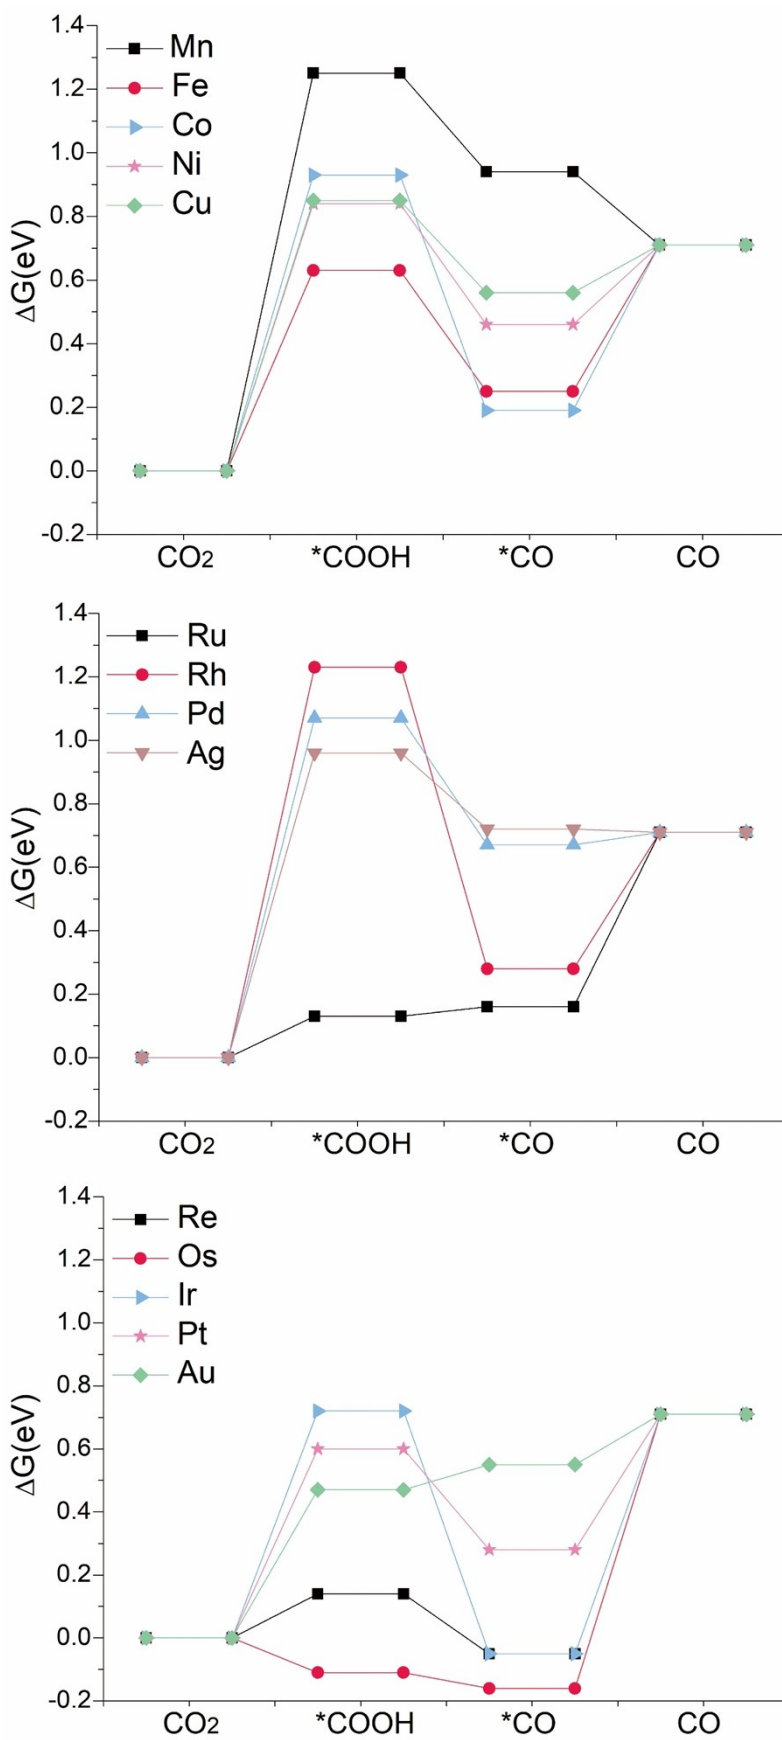

**Figure S6.** Free energy diagrams of eCO<sub>2</sub>RR to CO on TM@BC<sub>3</sub>.

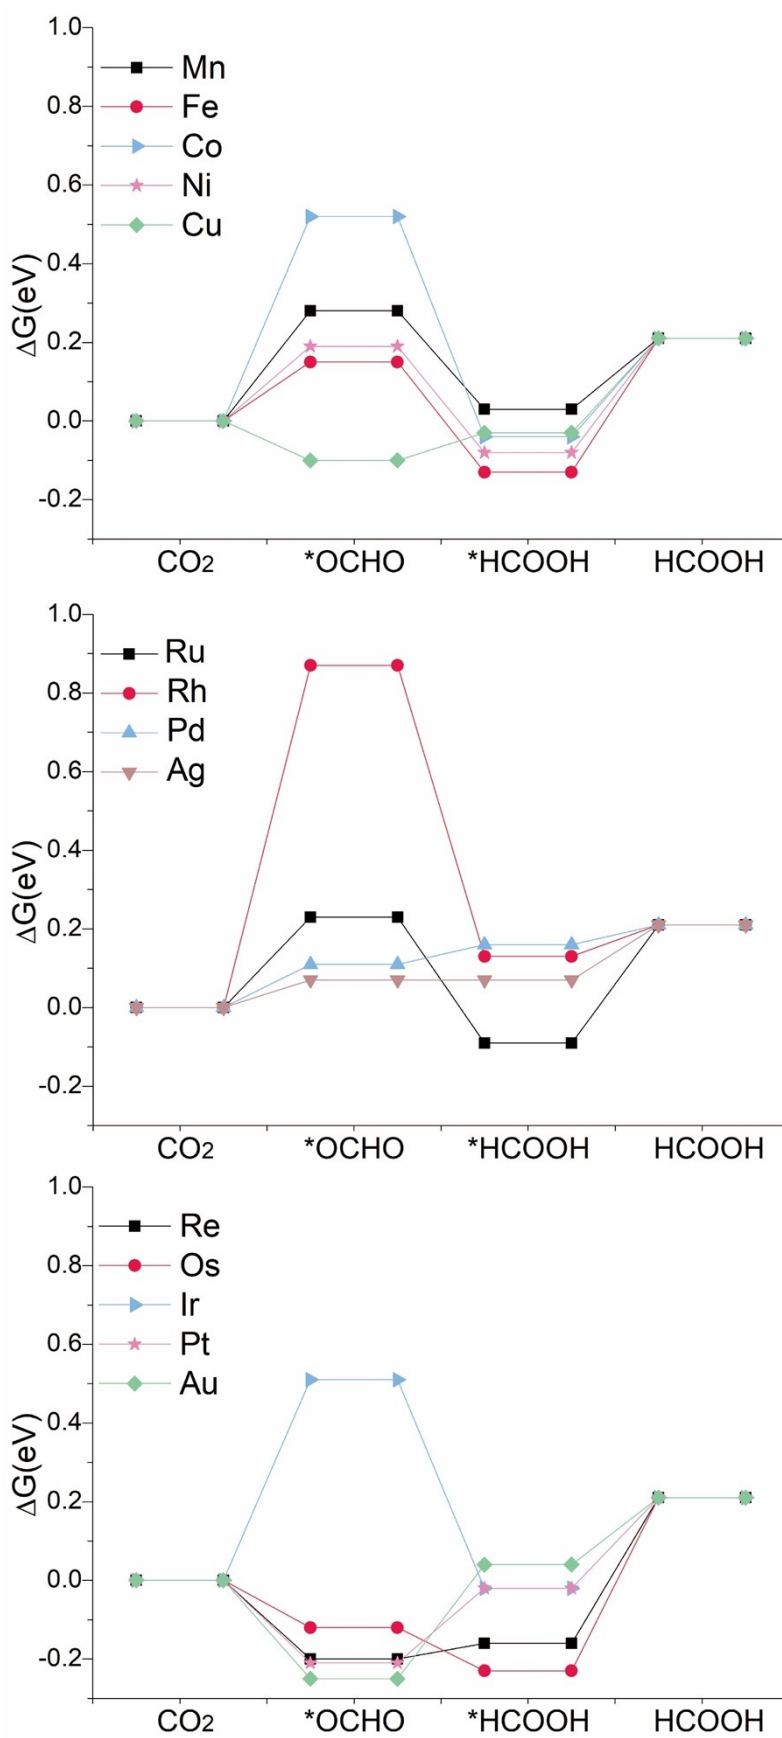

**Figure S7.** Free energy diagrams of eCO<sub>2</sub>RR to HCOOH on TM@BC<sub>3</sub>.



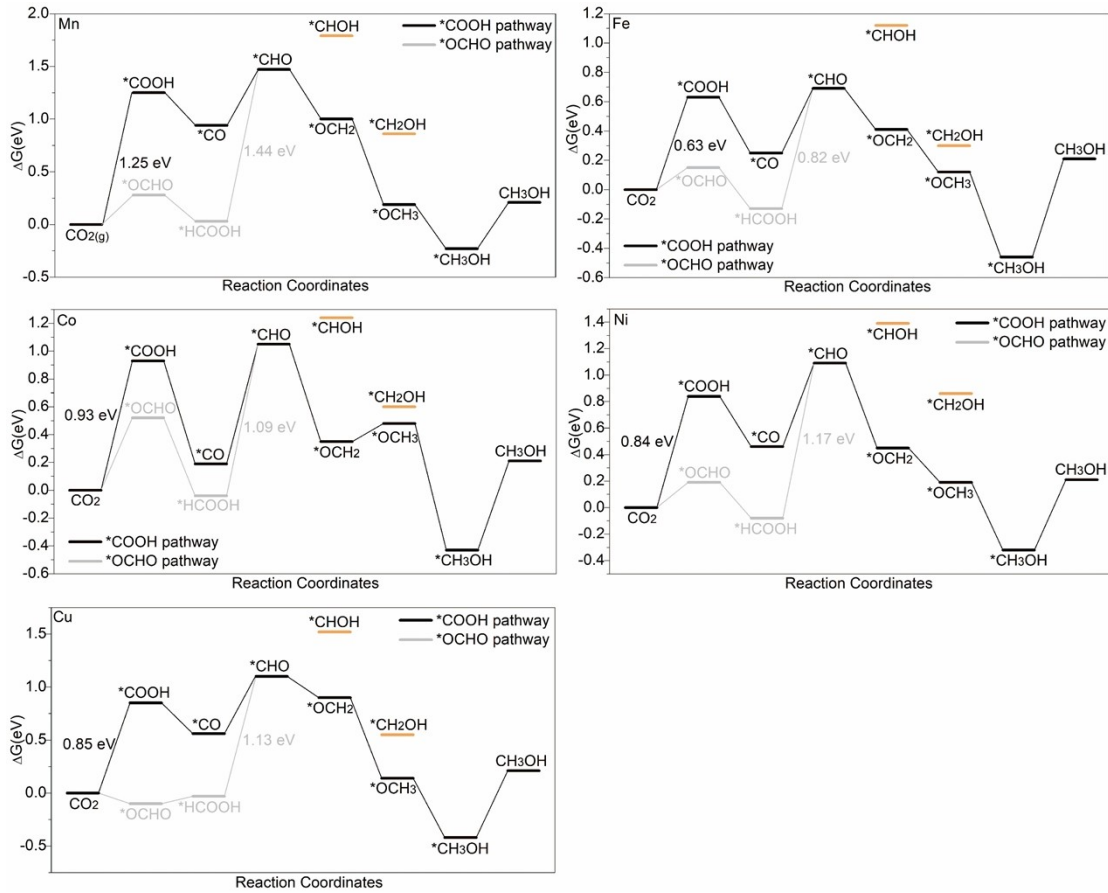

**Figure S8.** Free energy diagrams of eCO<sub>2</sub>RR to CH<sub>3</sub>OH on TM@BC<sub>3</sub>.

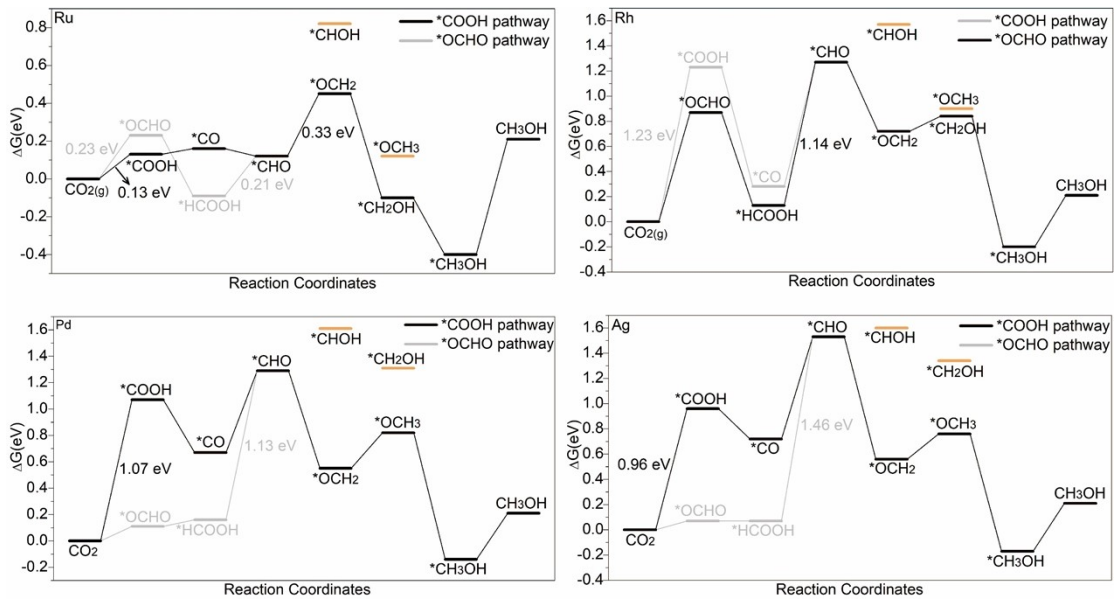

**Figure S9.** Free energy diagrams of eCO<sub>2</sub>RR to CH<sub>3</sub>OH on TM@BC<sub>3</sub>.



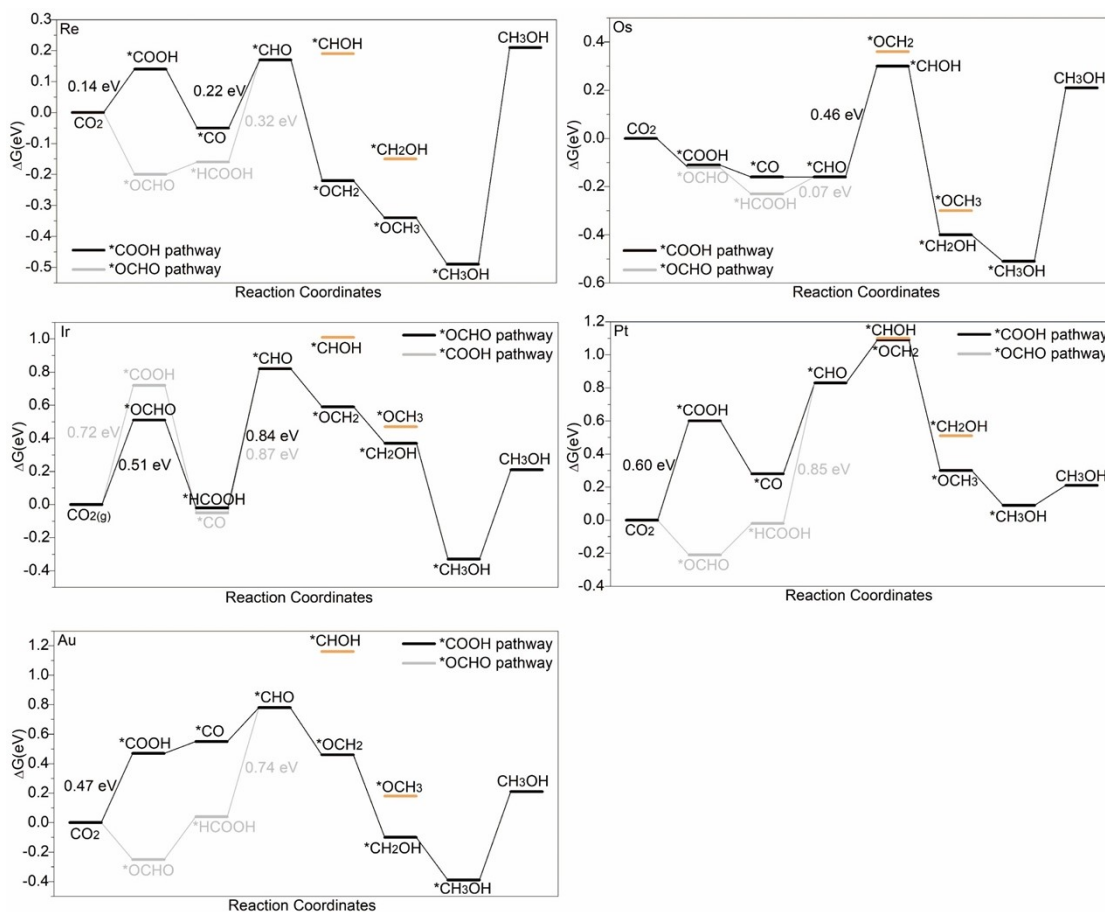

**Figure S10.** Free energy diagrams of eCO<sub>2</sub>RR to CH<sub>3</sub>OH on TM@BC<sub>3</sub>.

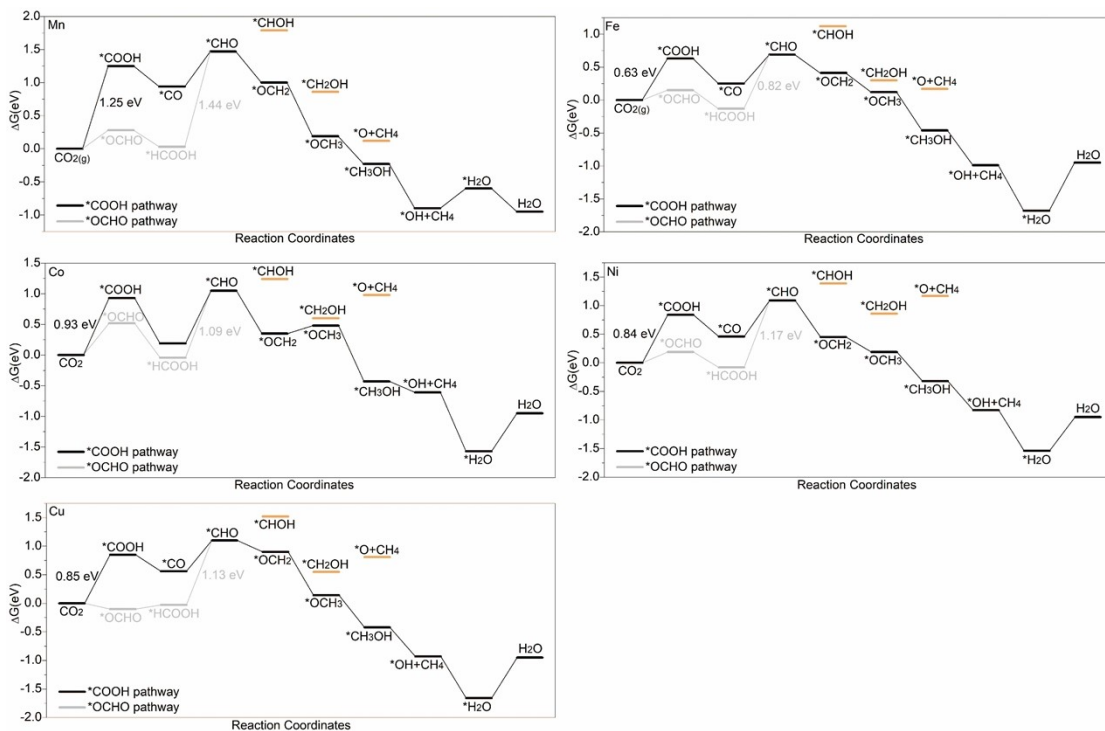

**Figure S11.** Free energy diagrams of eCO<sub>2</sub>RR to CH<sub>4</sub> on TM@BC<sub>3</sub>.

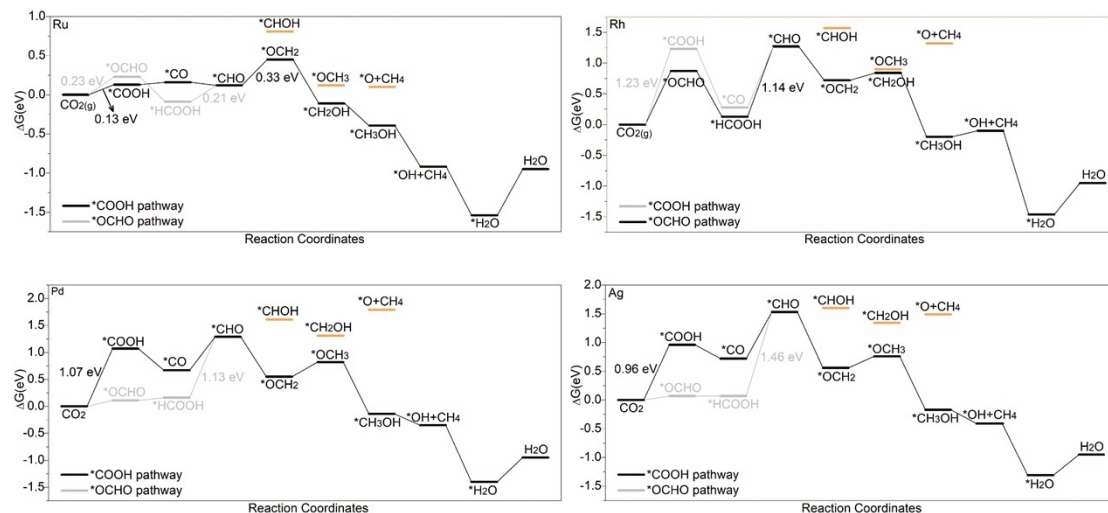

**Figure S12.** Free energy diagrams of eCO<sub>2</sub>RR to CH<sub>4</sub> on TM@BC<sub>3</sub>.

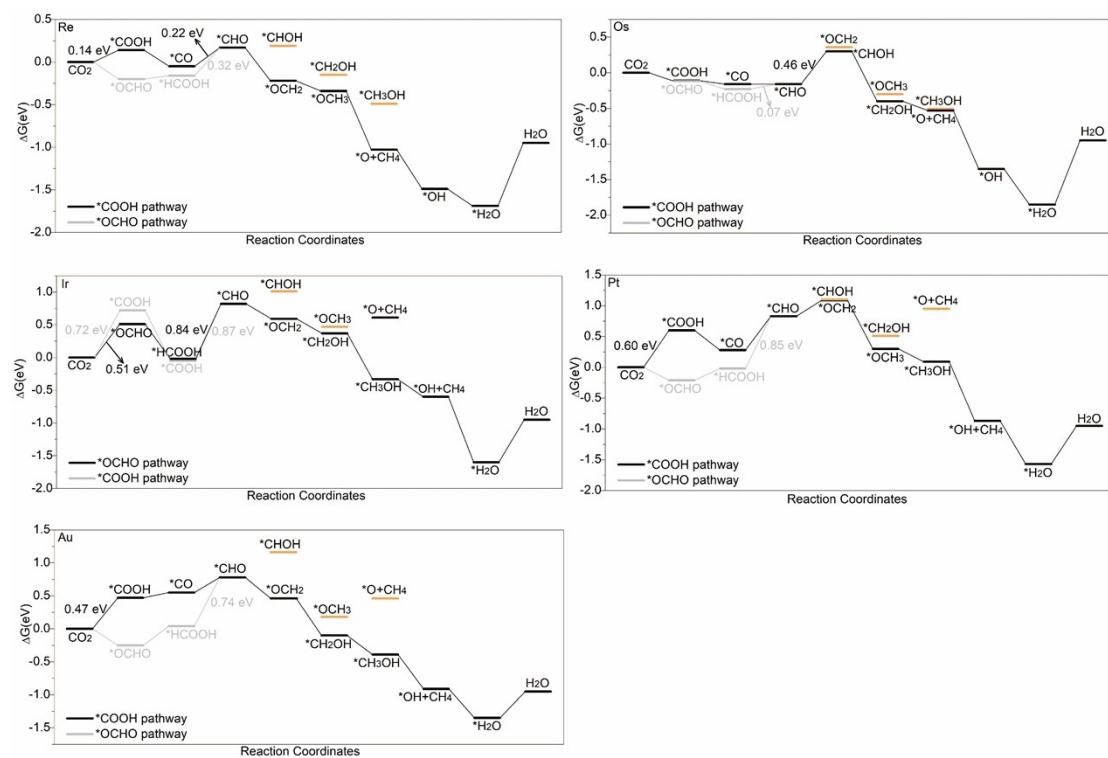

**Figure S13.** Free energy diagrams of eCO<sub>2</sub>RR to CH<sub>4</sub> on TM@BC<sub>3</sub>.

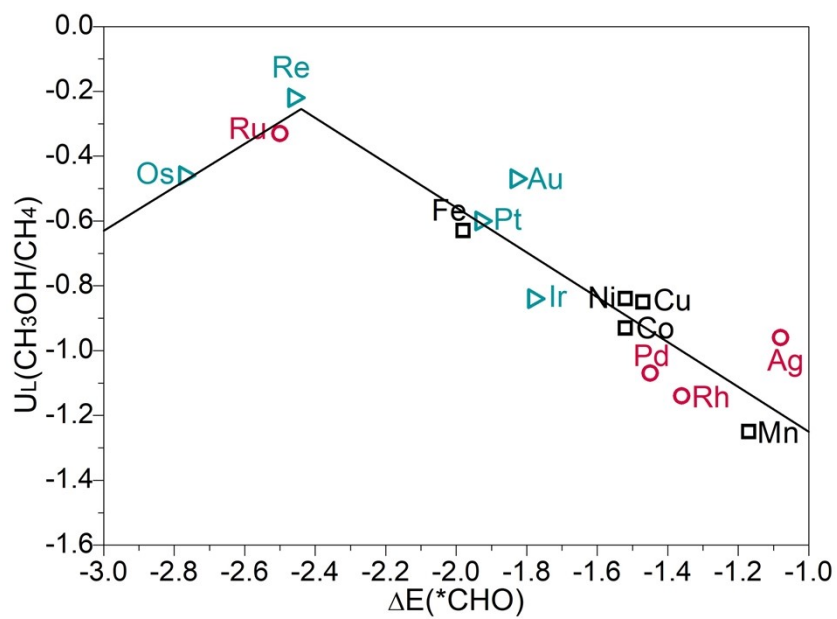

**Figure S14.** Volcano-shaped relation between the adsorption energy of  $*\text{CHO}$  and the  $U_L$  for  $\text{CH}_3\text{OH}$  and  $\text{CH}_4$  production.

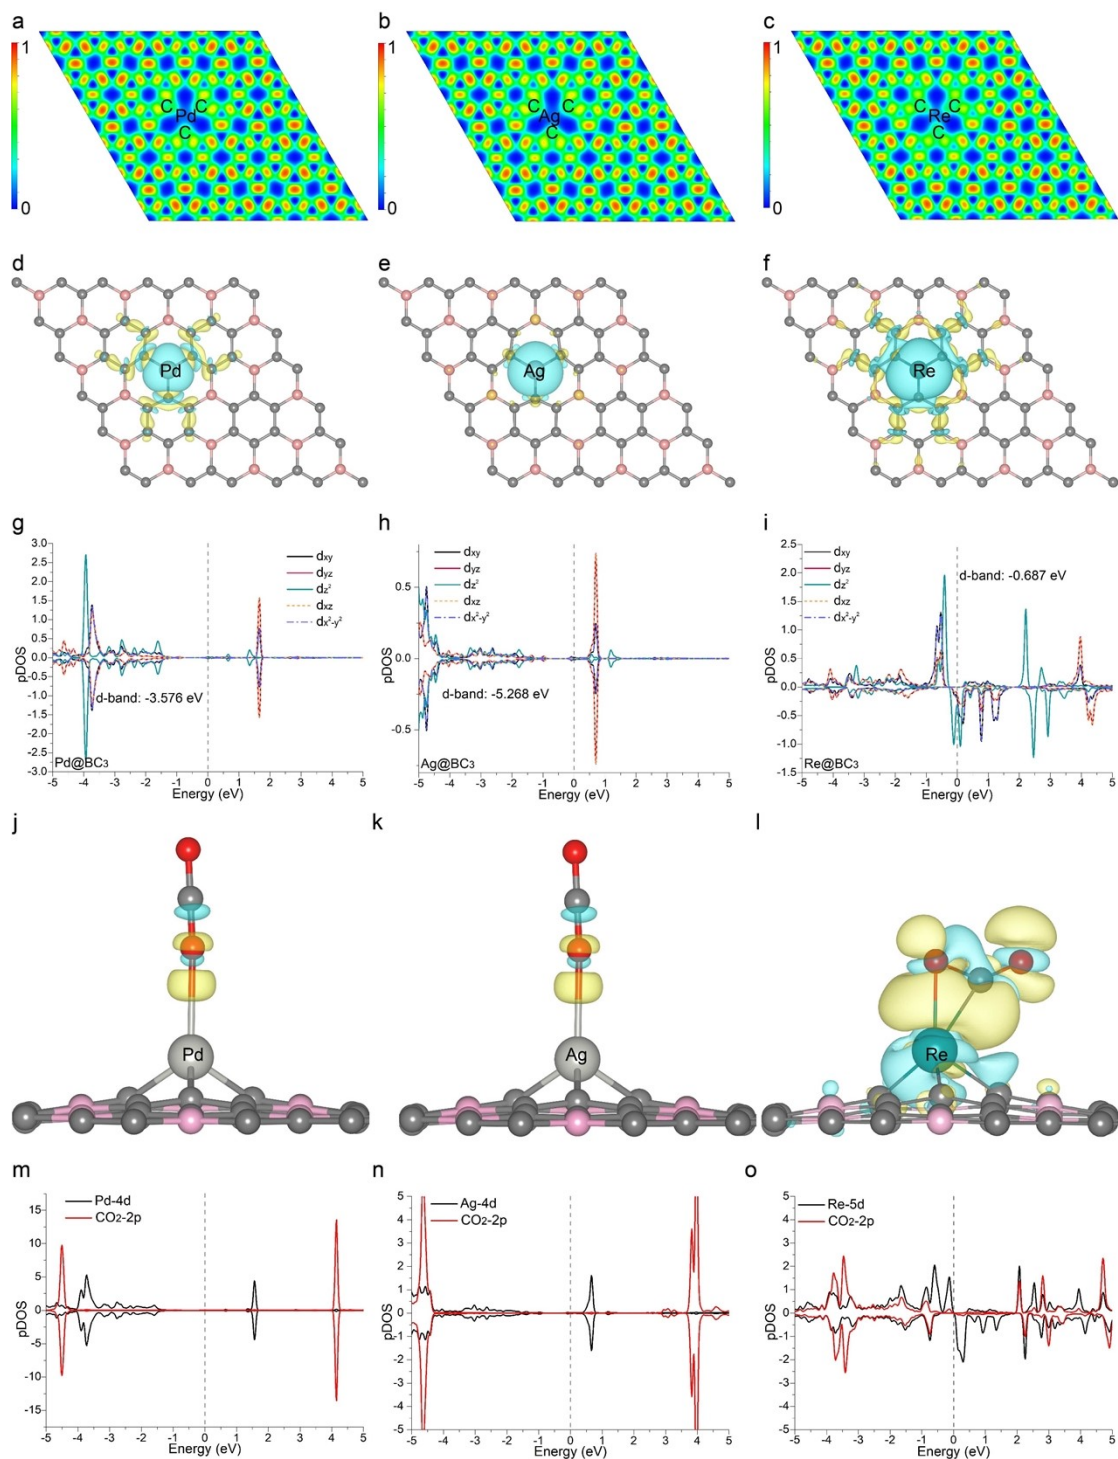

**Figure S15. Electronic structures of Pd, Ag and Re@BC<sub>3</sub> SACs and CO<sub>2</sub> adsorption.** Electron localization function (ELF) of (a) Pd, (b) Ag and (c) Re@BC<sub>3</sub> SACs. Charge density difference (CDD) between (d) Pd, (e) Ag, (f) Re SAs and B-defective BC<sub>3</sub>. Projected density of states (pDOS) of (g) Pd, (h) Ag, and (i) Re d sub-orbitals. CDD between CO<sub>2</sub> and (j) Pd, (k) Ag and (l) Re@BC<sub>3</sub> SACs. pDOS of CO<sub>2</sub>-2p and (m) Pd-4d, (n) Ag-4d and (o) Re-5d orbitals. Yellow and cyan regions indicate the accumulation and depletion of electron densities at the isosurface value of 0.002 e/Å<sup>3</sup>.

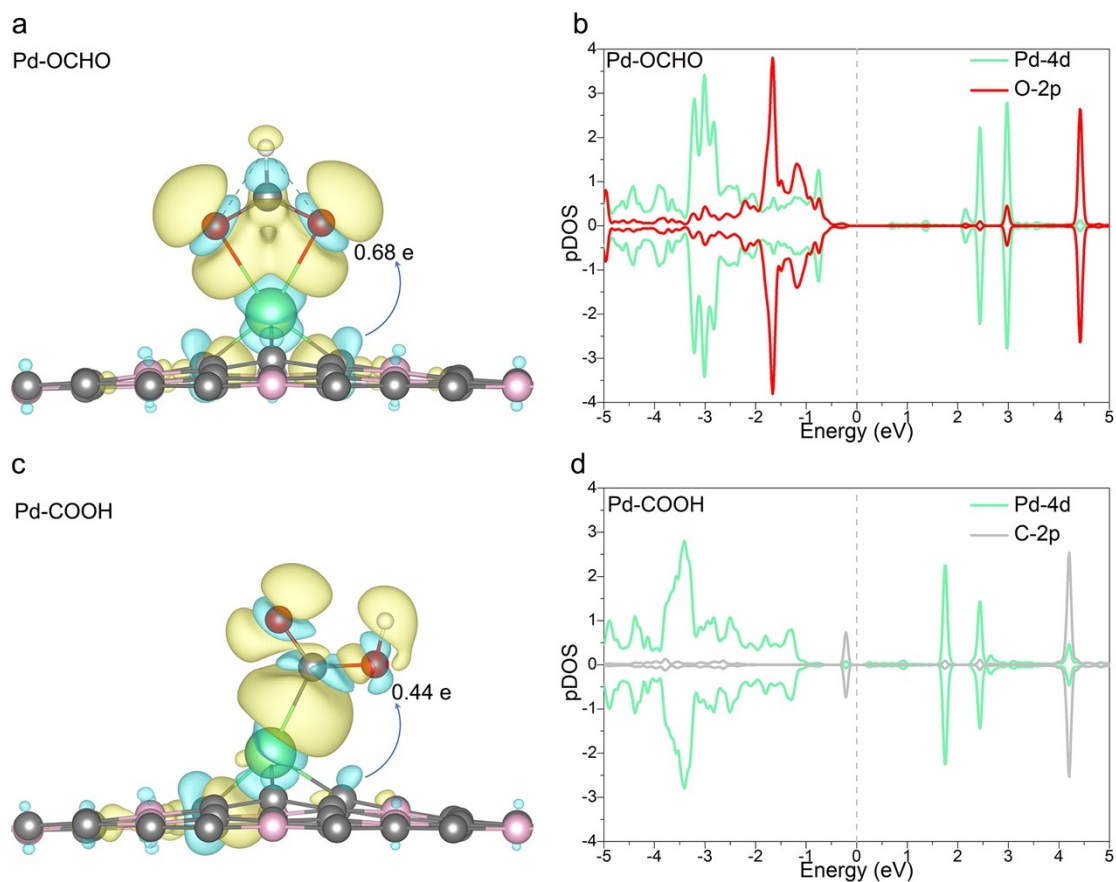

**Figure S16. Electronic interpretation of HCOOH activity and selectivity on Pd@BC<sub>3</sub>.** (a) Charge density difference (CDD) between Pd@BC<sub>3</sub> and the adsorbed OCHO (Pd-OCHO). (b) Projected density of states (pDOS) of Pd-4d, O-2p and C-2p in the adsorption system (Pd-OCHO). The O-2p and C-2p states are derived from the \*OCHO intermediate. (c) CDD between Pd@BC<sub>3</sub> and the \*COOH intermediate (denoted by Pd-COOH). (d) pDOS of Pd-4d, O-2p and C-2p in the adsorption system (Pd-COOH). The O-2p and C-2p states are derived from the \*COOH intermediate. Yellow and cyan regions indicate the accumulation and depletion of electron densities at the isosurface value of 0.002 e/Å<sup>3</sup>.



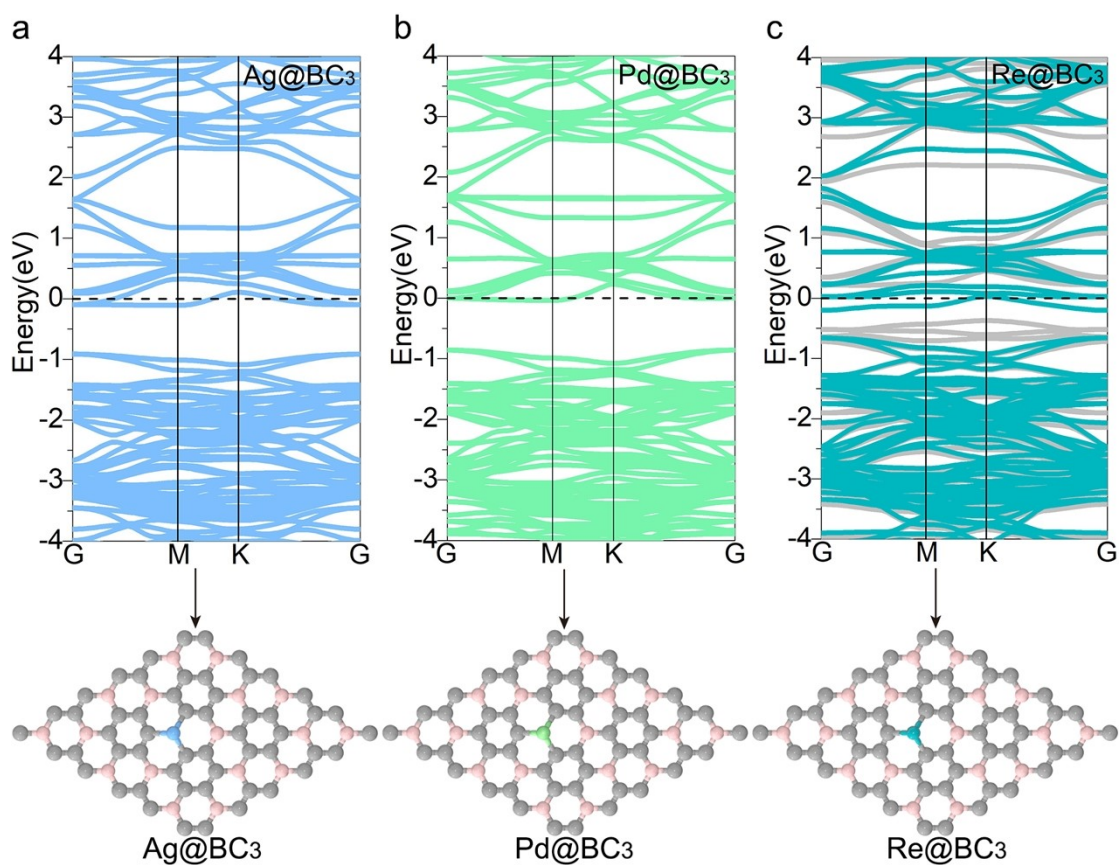

**Figure S17.** Band structures of (a) Ag@BC<sub>3</sub>, (b) Pd@BC<sub>3</sub> and (c) Re@BC<sub>3</sub>. The atomic structures are shown below. Re@BC<sub>3</sub> exhibits magnetism, and the band structures for both spin-up (grey) and spin-down (dark cyan) are plotted in the figure.

## REFERENCES

- (1) Nørskov, J. K.; Rossmeisl, J.; Logadottir, A.; Lindqvist, L.; Kitchin, J. R.; Bligaard, T.; Jónsson, H. Origin of the Overpotential for Oxygen Reduction at a Fuel-Cell Cathode. *The Journal of Physical Chemistry B* **2004**, *108*(46), 17886-17892, DOI: 10.1021/jp047349j.
- (2) Xudong Cui, W. A.; Xiaoyang Liu, H. W.; Yong Men, J. W. C<sub>2</sub>N-graphene supported single-atom catalysts for CO<sub>2</sub> electrochemical reduction reaction: mechanistic insight and catalyst screening. *Nanoscale* **2018**, *10*(32), 15262-15272, DOI: 10.1039/C8NR04961K.
- (3) Ou, J.; Kang, X.; Duan, X. In silico design of single transition metal atom anchored defective boron carbide monolayers as high-performance electrocatalysts for the nitrogen reduction reaction. *Nanoscale* **2022**, *14*(32), 12823-12829, DOI: 10.1039/d2nr02796h.
- (4) Wang, Y.; Zhou, N.; Li, Y. Electrochemical catalytic mechanism of single transition metal atom embedded BC<sub>3</sub> monolayer for oxygen reduction and evolution reactions. *Chem. Eng. J.* **2021**, *425*, 130631, DOI: 10.1016/j.cej.2021.130631.
- (5) Yanagisawa, H.; Tanaka, T.; Ishida, Y.; Matsue, M.; Rokuta, E.; Otani, S.; Oshima, C. Phonon Dispersion Curves of a BC<sub>3</sub> Honeycomb Epitaxial Sheet. *Phys. Rev. Lett.* **2004**, *17*(93), 177003, DOI: 10.1103/PhysRevLett.93.177003.
- (6) Liu, J.; Smith, S. C.; Gu, Y.; Kou, L. C—N Coupling Enabled by N—N Bond Breaking for Electrochemical Urea Production. *Adv. Funct. Mater.* **2023**, *33*(47), DOI: 10.1002/adfm.202305894.
- (7) Xu, H.; Cheng, D.; Cao, D.; Zeng, X. C. Revisiting the universal principle for the rational design of single-atom electrocatalysts. *Nature Catalysis* **2024**, *7*(2), 207-218, DOI: 10.1038/s41929-023-01106-z.
